# Supplementary material
Source: PubMed Central journal article supplement (PMC3760029)
Supplement: Supp_Table1.pdf [file Supp_Table1.pdf]

SUPPLEMENTARY TABLE S1. DNA SEQUENCES OF PRIMERS USED IN REAL-TIME AND CONVENTIONAL PCR

| <i>Gene name</i>    | <i>Sequences</i>                                                 | <i>Genebank accession number</i> |
|---------------------|------------------------------------------------------------------|----------------------------------|
| <i>Pparg</i>        | Forward: ATGGGTGAAACTCTGGGAGA<br>Reverse: GAGCTGATTCCGAAGTTGGT   | NM_011146                        |
| <i>Fabp4</i> (AP-2) | Forward: CCGCAGACGACAGGA<br>Reverse: CTCATGCCCTTTCATAAACT        | NM_024406                        |
| <i>Cebpa</i>        | Forward: TGGACAAGAACAGCAACGAGTA<br>Reverse: GCAGTTGCCATGGCCTTGA  | NM_007678                        |
| <i>Adiponectin</i>  | Forward: TGTCCTCTTAATCCTGCCCCA<br>Reverse: CCAACCTGCACAAGTTCCCTT | NM009605                         |
| <i>Pref1</i>        | Forward: AGTGCGAAACCTGGGTGTC<br>Reverse: GCCTCCTTGTTGAAAGTGGTCA  | AK_005522                        |
| <i>Glut4</i>        | Forward: GCTTGGCTCCCTTCAGTTTG<br>Reverse: TGCCTTGTGGGATGGAATC    | NM_009204                        |
| <i>Gapdh</i>        | Forward: AGGTCGGTGTGAACGGATTG                                    | NM_008084                        |

*Pparg*, peroxisome proliferator-activated receptor  $\gamma$ ; *Ap2*, adipocyte protein 2; *Fabp4*, fatty acid-binding protein 4; *Cebpa*, CCAAT enhancer-binding protein alpha; *Pref1*, preadipocyte factor 1; *Glut4*, glucose transporter 4; *Gapdh*, Glyceraldehyde 3-phosphate dehydrogenase.
