# Supplementary material
Source: PubMed Central journal article supplement (PMC3760029)
Supplement: Supp_Table2.pdf [file Supp_Table2.pdf]

SUPPLEMENTARY TABLE S2. ANTIBODIES USED IN FLOW CYTOMETRY ANALYSIS AND CELL SORTING

| <i>Antigen detected</i> | <i>Name of antibodies</i>                     | <i>Manufacturer</i> |
|-------------------------|-----------------------------------------------|---------------------|
| Sca-1 (Ly-6A/E)         | FITC Rat Anti-Mouse Ly-6A/E                   | BD Pharmingen       |
| CD34                    | Anti-Mouse CD34 FITC                          | Ebioscience, Inc.   |
| CD73                    | PE Rat Anti-Mouse CD73                        | BD Pharmingen       |
| CD90                    | FITC Rat Anti-Mouse CD90.2                    | BD Pharmingen       |
| CD105                   | Anti-Mouse CD105 (Endoglin) PE                | Ebioscience, Inc.   |
| CD105                   | APC anti-mouse CD105 Antibody                 | Biolegend           |
| Lineage markers         | Lineage Cell Detection Cocktail-Biotin, mouse | Miltenyi Biotec     |
| Biotin                  | Anti-Biotin FTIC                              | Miltenyi Biotec     |
